# Supplementary material for: Contact transmission of influenza virus between ferrets imposes a looser bottleneck than respiratory droplet transmission allowing propagation of antiviral resistance
Source: Springer Nature journal article supplement (doi:10.1038/srep29793), 2016-07-19
Supplement: 41598_2016_BFsrep29793_MOESM43_ESM.pdf [file 41598_2016_BFsrep29793_MOESM43_ESM.pdf]

**Title:** Contact transmission of influenza virus between ferrets imposes a looser bottleneck than respiratory droplet transmission allowing propagation of antiviral resistance

**Authors:** Rebecca Frise<sup>1</sup>, Konrad Bradley<sup>1</sup>, Neeltje van Doremalen<sup>1,4</sup>, Monica Galiano<sup>2</sup>, Ruth A. Elderfield<sup>1</sup>, Peter Stilwell<sup>1,5</sup>, Jonathan W. Ashcroft<sup>1,6</sup>, Mirian Fernandez-Alonso<sup>2,7</sup>, Shahjahan Miah<sup>2</sup>, Angie Lackenby<sup>2</sup>, Kim L. Roberts<sup>1,8</sup>, Christl A. Donnelly<sup>3</sup>, and Wendy S. Barclay<sup>1,\*</sup>.

Supplementary Figure S1

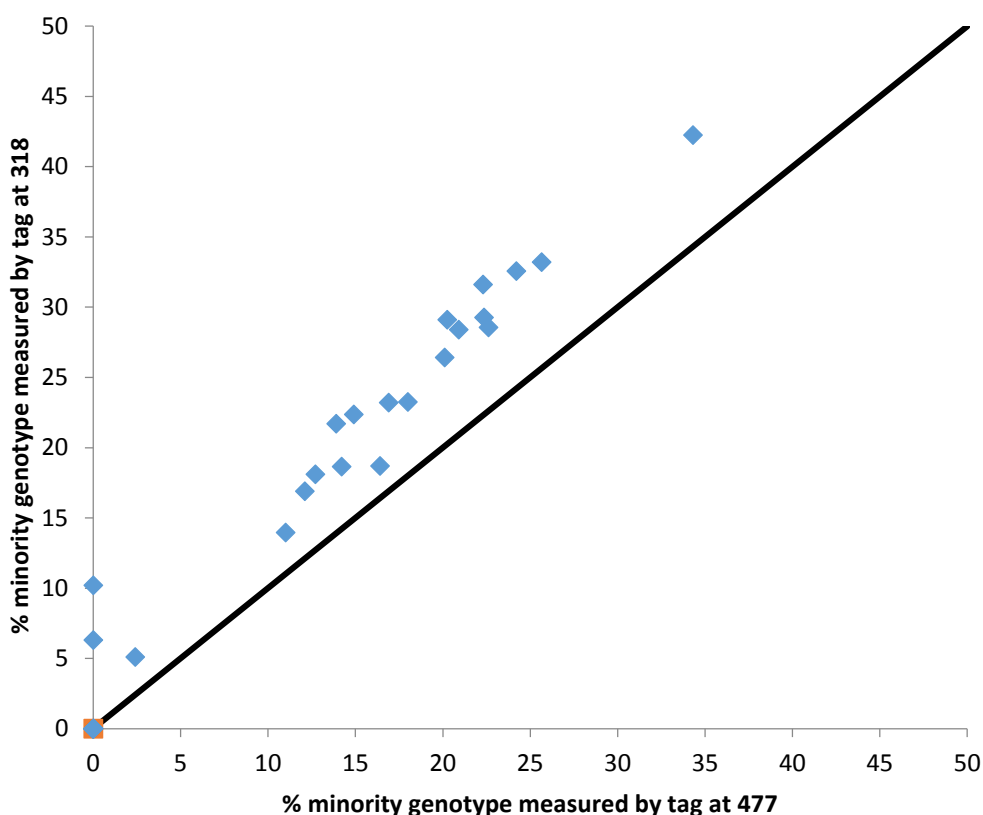

**Correlation between measurement of proportions of virus genotype using either of the two engineered tags in PB2 segment.**

Data for 38 separate nasal washes measured using pyrosequencing for either tag at nucleotide 318 or tag at nucleotide 477 were plotted. The solid line shows a hypothetical equality.
